# Supplementary material
Source: publisher figshare collection journal article supplement (https://acs.figshare.com/ndownloader/files/14505059)
Supplement: Supplementary file 1 [file 14505059]

# **Supporting information**

## **For**

Dispersive matrix solid-phase extraction method coupled with high performance liquid chromatography-tandem mass spectrometry for ultrasensitive quantification of endogenous brassinosteroids in minute plants and its application for geographical distribution study

Yuxuan Li<sup>a,b,1</sup>, Ting Deng<sup>a,b,1</sup>, Chunfeng Duan<sup>a,\*</sup>, Lanxiu Ni<sup>a,b</sup>, Nan Wang<sup>a,b</sup>, Yafeng Guan<sup>a,\*</sup>

<sup>a</sup> CAS Key Laboratory of Separation Sciences for Analytical Chemistry, Dalian Institute of Chemical Physics, Chinese Academy of Sciences, 457 Zhongshan Road, Dalian 116023, P.R. China

<sup>b</sup> University of Chinese Academy of Sciences, Beijing 100039, P.R. China

\* Corresponding authors.

E-mail address: guanyafeng@dicp.ac.cn (Y. Guan), cfduan@dicp.ac.cn (C. Duan)

Phone/Fax: +86-411-8437 9590

<sup>1</sup> These authors contributed equally to this work.

## Figure Captions

**Figure S1** Effect of solid dispersant of DMSPE on the recoveries of BRs (n=3).

Conditions: 0.2 ng mL<sup>-1</sup> of standard BRs solution; the recovery was calculated by  $A/A_1 \times 100\%$ , where A was the peak area of standard BRs using DMSPE method, A<sub>1</sub> was the peak area of standard BR solution without sample preparation.

**Figure S2** Effect of the temperature of vibration and centrifugation on the recoveries of BRs (n=3). Conditions: oilseed rape samples spiked 0.2 ng mL<sup>-1</sup> BRs; the recovery was calculated by  $(A-A_0)/A_1 \times 100\%$ , where A was the peak area of BRs in spiked plant sample, A<sub>0</sub> was the peak area of BRs in plant sample, A<sub>1</sub> was the peak area of standard BR solution without sample preparation.

## Tables

**Table S1** Absolute recoveries of d<sub>3</sub>-24-epiBL and d<sub>3</sub>-24-epiCS in the 2.0 mg FW of oilseed rape samples (n=3).

**Table S2** Method comparison between the present and others.

## Reference

1. P. Xin; J. Yan; J. Fan; J. Chu; C. Yan, A dual role of boronate affinity in high-sensitivity detection of vicinal diol brassinosteroids from sub-gram plant tissues via UPLC-MS/MS, *Analyst* **2013**, 138, 1342-1345.
2. Wang, Q.; Cai, W.-J.; Yu, L.; Ding, J.; Feng, Y.-Q., Comprehensive Profiling of Phytohormones in Honey by Sequential Liquid-Liquid Extraction Coupled with Liquid Chromatography-Mass Spectrometry. *Journal of Agricultural and Food Chemistry* **2017**, 65 (3), 575-585.
3. Wang, L.; Duan, C.; Wu, D.; Guan, Y., Quantification of endogenous brassinosteroids in sub-gram plant tissues by in-line matrix solid-phase dispersion-tandem solid phase extraction coupled with high performance liquid chromatography-tandem mass spectrometry. *Journal of Chromatography A* **2014**, 1359, 44-51.

4. L. Yu, J. Ding; Y.. Wang;P. Liu; Y. Feng, 4-Phenylaminomethyl-benzeneboric acid modified tip extraction for determination of brassinosteroids in plant tissues by stable isotope labeling-liquid chromatography-mass spectrometry, *Analytical Chemistry* **2016**, 88, 1286–1293.

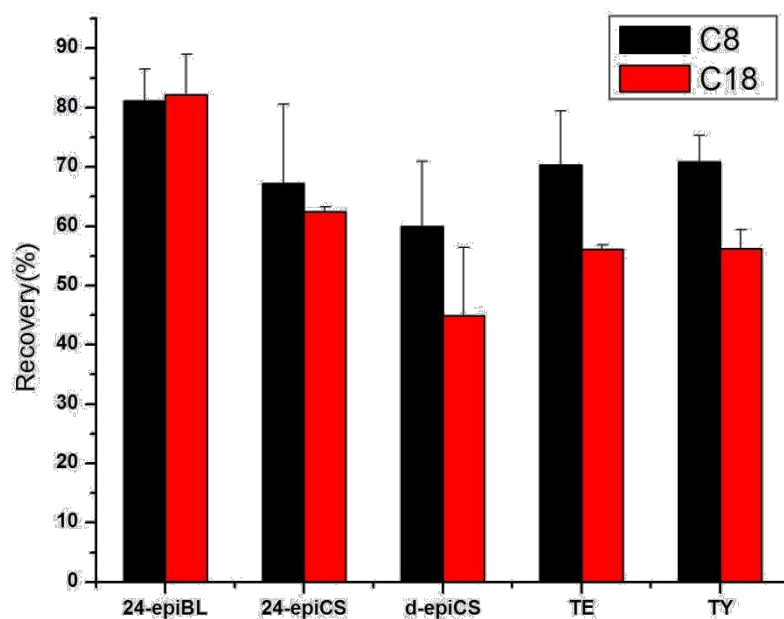

**Figure S1** Effect of solid dispersant of DMSPE on the recoveries of BRs (n=3).

Conditions:  $0.2 \text{ ng mL}^{-1}$  of standard BRs solution; the recovery was calculated by  $A/A_1 \times 100\%$ , where A was the peak area of standard BRs using DMSPE method,  $A_1$  was the peak area of standard BR solution without sample preparation.

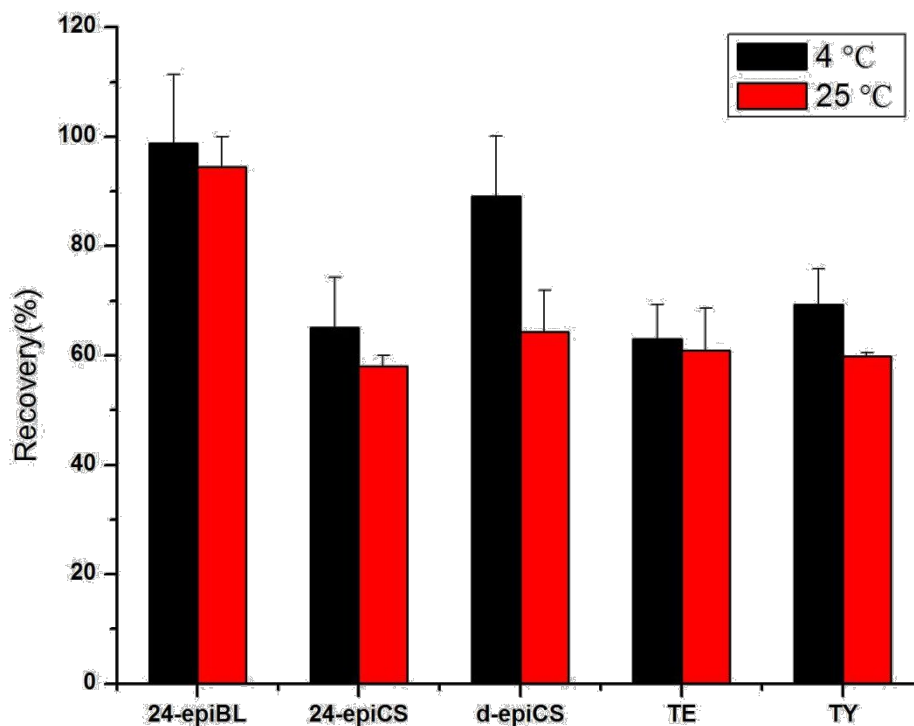

**Figure S2** Effect of temperature of vibration and centrifugation on the recoveries of BRs (n=3).

Conditions: oilseed rape samples spiked  $0.2 \text{ ng mL}^{-1}$  BRs; the recovery was calculated by  $(A-A_0)/A_1 \times 100\%$ , where  $A$  was the peak area of BRs in spiked plant sample,  $A_0$  was the peak area of BRs in plant sample,  $A_1$  was the peak area of standard BR solution without sample preparation.

Table S1 Absolute recoveries of d<sub>3</sub>-24-epiBL and d<sub>3</sub>-24-epiCS in the 2.0 mg FW of oilseed rape samples (n=3).

|                          | Absolute recoveries (%) | CV (%) |
|--------------------------|-------------------------|--------|
| d <sub>3</sub> -24-epiBL | 115.3                   | 5.2    |
| d <sub>3</sub> -24-epiCS | 98.2                    | 4.2    |

**Table S2** Method comparison between the present and others.

| Method          | Sample                                                | Analytes                                   | LOD<br>(pg)             | Sample amount<br>(mg FW) | Analytical<br>time (h) | Ref.         |
|-----------------|-------------------------------------------------------|--------------------------------------------|-------------------------|--------------------------|------------------------|--------------|
| SPE-MSPE        | <i>Arabidopsis thaliana</i> siliques                  | BL, CS, TY, TE, 24-epiBL                   | 0.34~0.44               | 500                      | >2                     | 1            |
| LLE             | Honey                                                 | 28-norBL, BL, 28-homoBL,<br>28-norCS, CS   | 0.04~0.31               | 100                      | >1                     | 2            |
| MSPD-tandem SPE | Rice                                                  | TY, TE, 24-epiBL, 24-epiCS, DS,<br>d-epiCS | 0.04~0.2                | 50                       | >1                     | 3            |
| tip extraction  | Rice                                                  | 28-norBL, BL, 28-homoBL,<br>28-norCS, CS   | 0.02~0.11               | 50                       | <1                     | 4            |
| DMSPE           | Oilseed rape<br><i>Arabidopsis thaliana</i> seedlings | 24-epiBL, 24-epiCS, d-epiCS, TE, TY        | 0.069~0.34 <sup>a</sup> | 2                        | <1                     | this<br>work |

<sup>a</sup> For Oilseed rape.
